# Supplementary material for: Methane oxidation in the waters of a humic-rich boreal lake stimulated by photosynthesis, nitrite, Fe(III) and humics
Source: Copernicus journal article supplement (doi:10.5194/bg-18-3087-2021), 2021-05-20
Supplement: Supplementary file 1 [file bg-18-3087-2021-supplement.pdf]

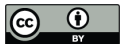

*Supplement of*

**Methane oxidation in the waters of a humic-rich boreal lake stimulated by photosynthesis, nitrite, Fe(III) and humics**

**Sigrid van Grinsven et al.**

*Correspondence to:* Sigrid van Grinsven ([sigrid.vangrinsven@eawag.ch](mailto:sigrid.vangrinsven@eawag.ch)) and Carsten J. Schubert ([carsten.schubert@eawag.ch](mailto:carsten.schubert@eawag.ch))

The copyright of individual parts of the supplement might differ from the article licence.

1

2 **Table S1. Specifics of the CARD-FISH probes applied.**

| Probe        | Specificity      | % Formamide in hybridization buffer | Probe sequence (5'-3')                                                        | Publication               |
|--------------|------------------|-------------------------------------|-------------------------------------------------------------------------------|---------------------------|
| ANME-1-350   | ANME-1           | 40%                                 | AGT TTT CGC GCC TGATGC                                                        | (Boetius et al., 2000)    |
| ANME-2-538   | ANME-2           | 40%                                 | GGC TAC CAC TCG GGC CGC                                                       | (Treude et al., 2005)     |
| EUB338 I-III | Most bacteria    | 35%                                 | GCT GCC TCC CGT AGG AGT<br>GCA GCC ACC CGT AGG TGT<br>GCT GCC ACC CGT AGG TGT | (Daims et al., 1999)      |
| Ma450        | Alpha-MOB        | 20%                                 | ATC CAG GTA CCG TCA TTA<br>TC                                                 | (Eller and Frenzel, 2001) |
| Mgamma84     | Gamma-MOB        | 20%                                 | CCA CTC GTC AGC GCC CGA                                                       | (Eller and Frenzel, 2001) |
| Mgamma705    |                  |                                     | CTG GTG TTC CTT CAG ATC                                                       |                           |
| NON338       | Negative control | 35%                                 | ACT CCT ACG GGA GGC AGC                                                       | (Wallner et al., 1993)    |

3

4 **Table S2. Experimental setups to quantify methane oxidation potential and the influence of**  
5 **different electron acceptors on methane oxidation.**

| Setup               | Stock solution                              | Treatment              | Conditions | Depths           |
|---------------------|---------------------------------------------|------------------------|------------|------------------|
| dark                | --                                          | --                     | dark       | 3, 4, 5, 7 & 9 m |
| nitrate             | 5 mM 100 at.% $^{15}\text{NO}_3^-$          | 40 $\mu\text{M}$       | dark       |                  |
| nitrite             | 5 mM 100 at.% $^{15}\text{NO}_2^-$          | 20 $\mu\text{M}$       | dark       |                  |
| AQDS <sup>1</sup>   | 10 g l <sup>-1</sup> AQDS                   | 44 mg l <sup>-1</sup>  | dark       |                  |
| light               | --                                          | --                     | light      | 3, 4 & 5 m       |
| oxygen              | saturated O <sub>2</sub> solution           | 15 $\mu\text{M}$       | dark       |                  |
| Humics <sup>2</sup> | 2 g l <sup>-1</sup> LHA                     | 125 mg l <sup>-1</sup> | dark       | 5, 7 & 9 m       |
| Fe(III)             | 100 mM ferrihydrite suspension <sup>3</sup> | 100 $\mu\text{M}$      | dark       |                  |
| Mn(IV)              | 100 mM birnessite suspension <sup>4</sup>   | 100 $\mu\text{M}$      | dark       |                  |

6 <sup>1</sup>AQDS: anthraquinone-2,6-disulfonate (J&K Scientific)7 <sup>2</sup>Leonardite Humic Acid Standard (purchased from the International Humic Substances Society)8 <sup>3</sup>ferrihydrite was synthesized according to Cornell and Schwertmann (Cornell and Schwertmann, 2003)9 <sup>4</sup>birnessite was synthesized according to Golden et al. (Golden et al., 1987)

10 **Fig. S1.** Profiles of sulfate, sulfide (A), dissolved iron (B) and manganese (C) in the Lake Lovojärvi  
11 water column.

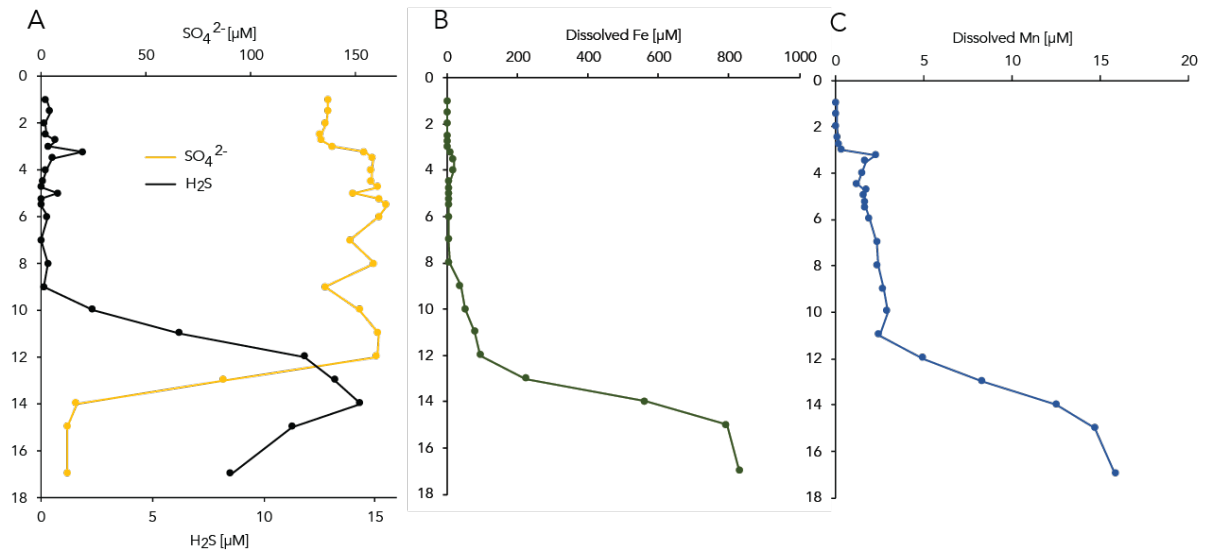

12

13 **Fig. S2.** Depth profiles of (A) DIC and  $\delta^{13}\text{C}$ -DIC, (B) conductivity and turbidity and (C) pH. DIC –  
14 Dissolved inorganic carbon.

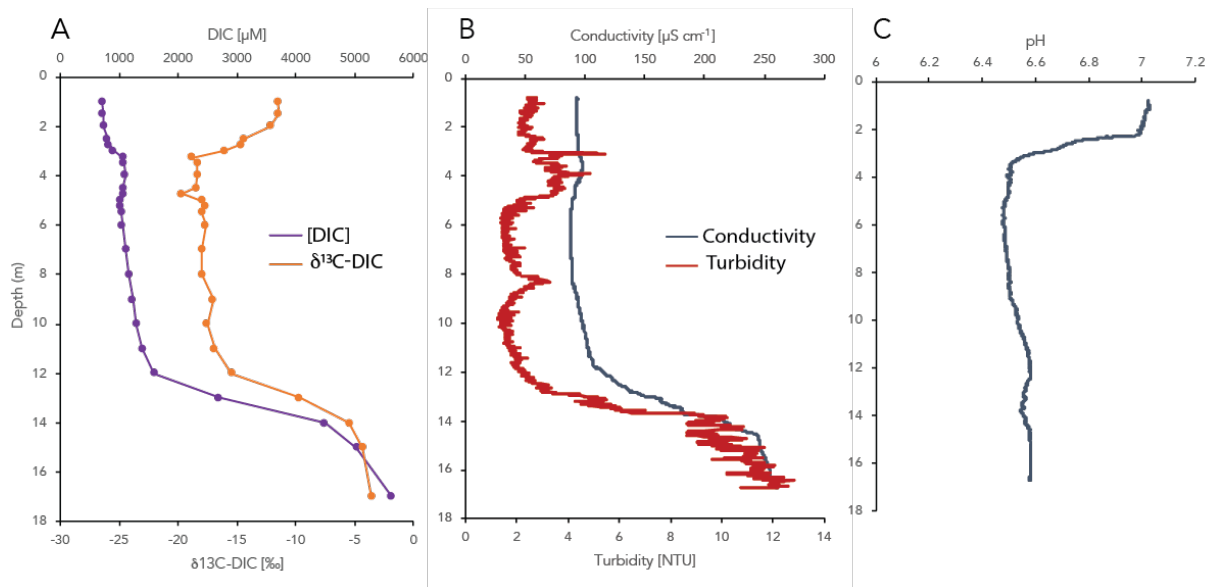

15

16

17 **Fig. S3.** Relative abundance of Alphaproteobacteria, Rhizobiales and *Methylocystaceae* reads  
18 according to 16S rRNA sequencing.

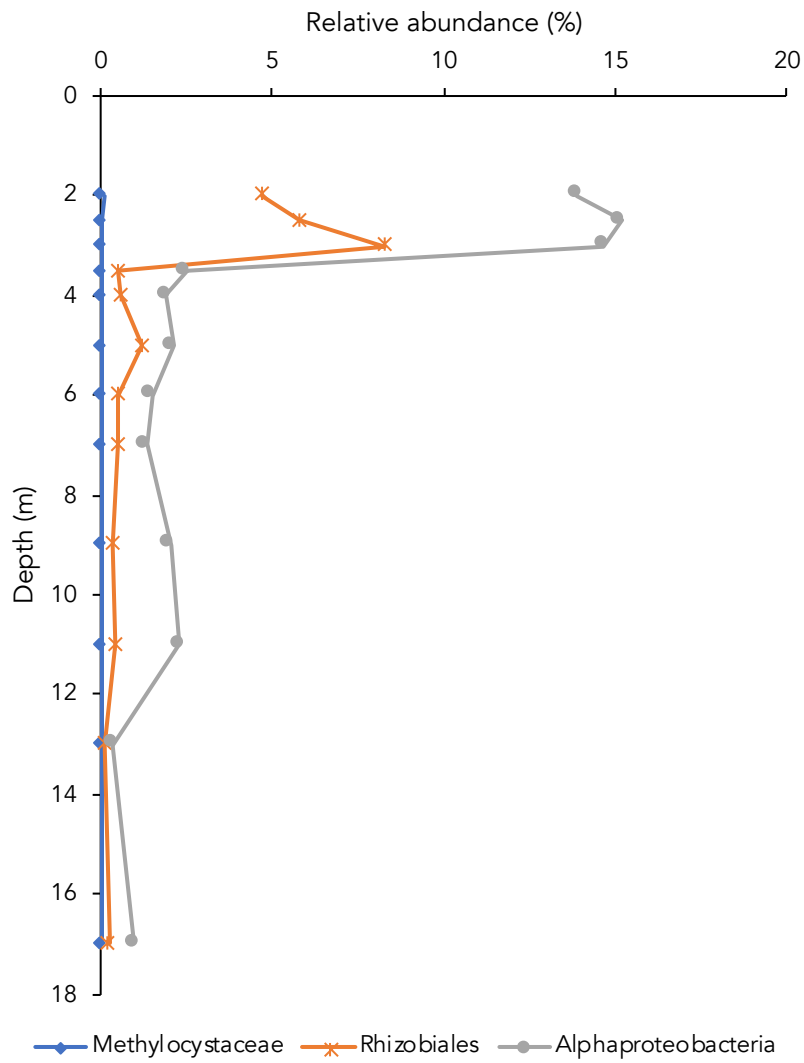

19

20

21
